# Supplementary material
Source: MDPI journal article supplement (https://www.mdpi.com/2297-8739/11/4/127)
Supplement: s1 [file s1]

# Supplementary files

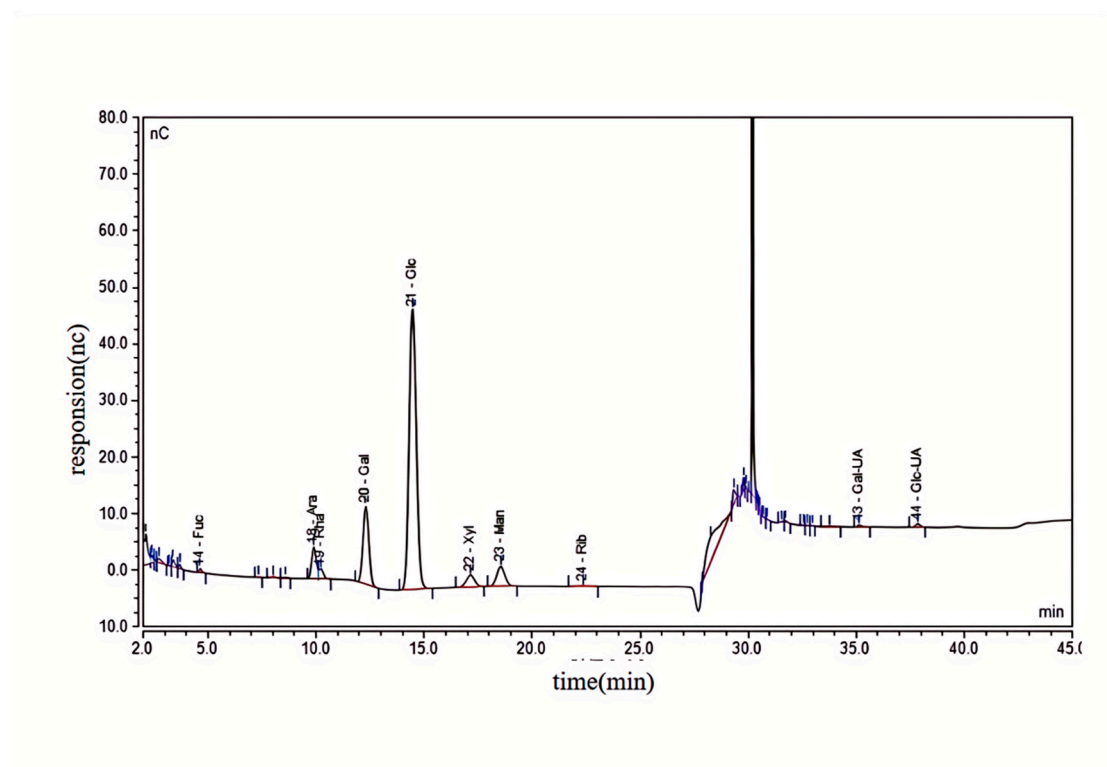

Figure S1 Ionic chromatogram of lemongrass essential oil

Note: The horizontal coordinate is the retention Time of detection (Time, min), and the vertical coordinate is the Response value of ion detection (nC).

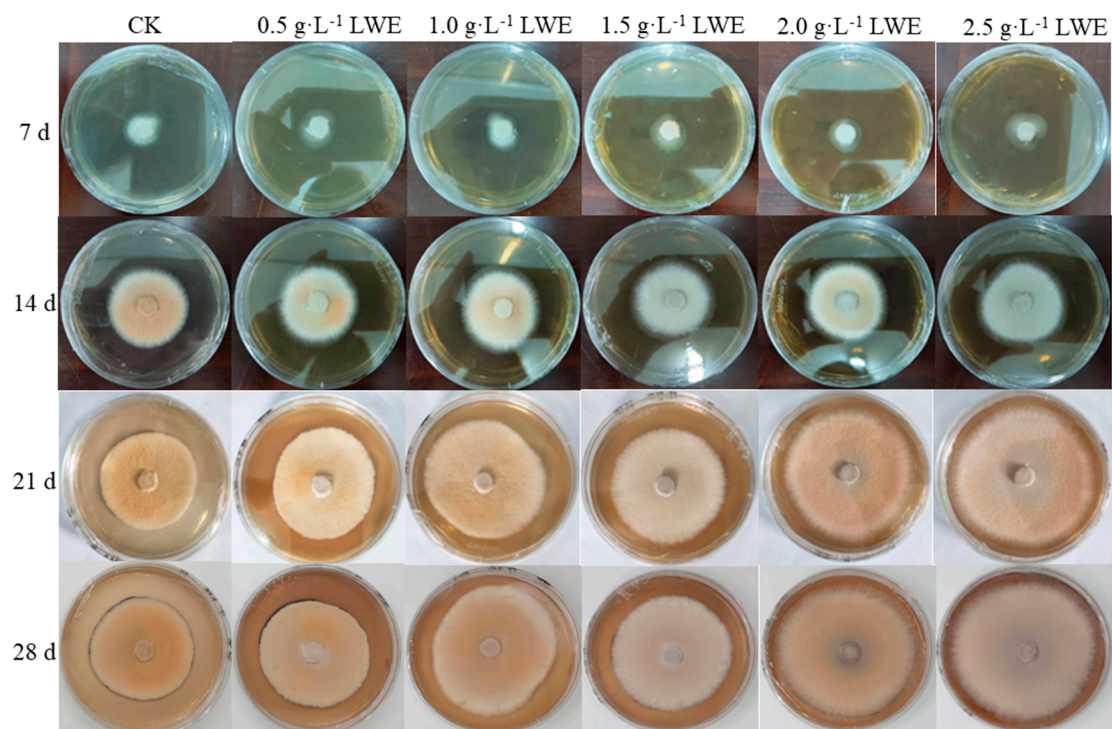

Figure S2 0.5, 1, 1.5, 2.0, and 2.5 g·L<sup>-1</sup> LWE in basal medium culture *T. camphoratus* mycelia separately.

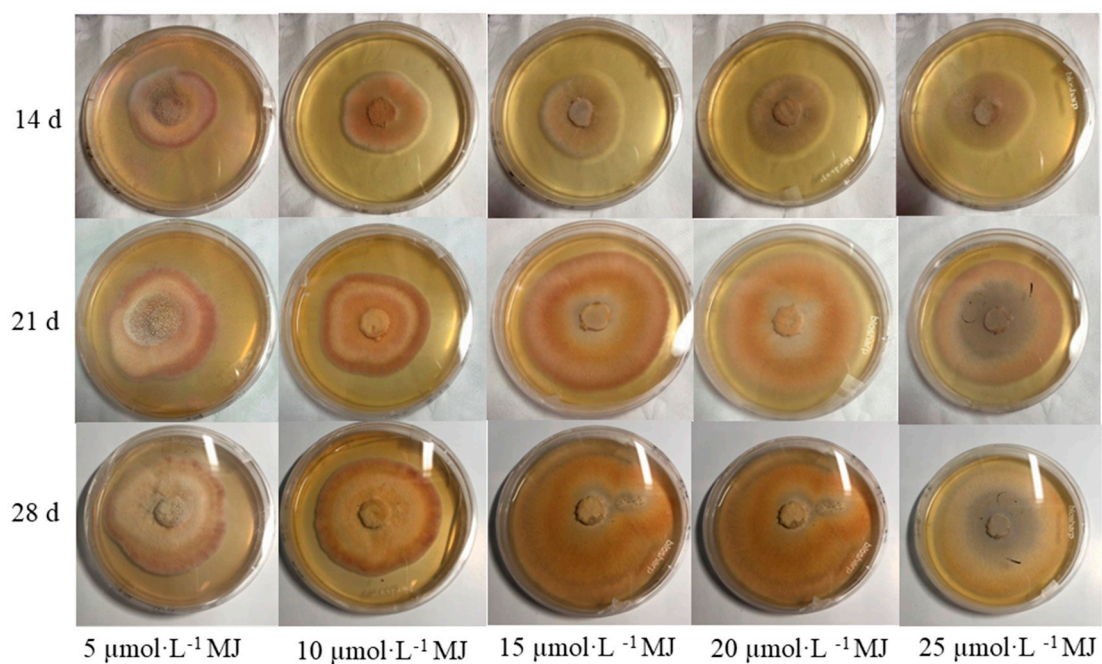

Figure S3 5, 10, 15, 20, and 25  $\mu\text{mol}\cdot\text{L}^{-1}$  MJ in basal medium culture *T. camphoratus* mycelia separately.

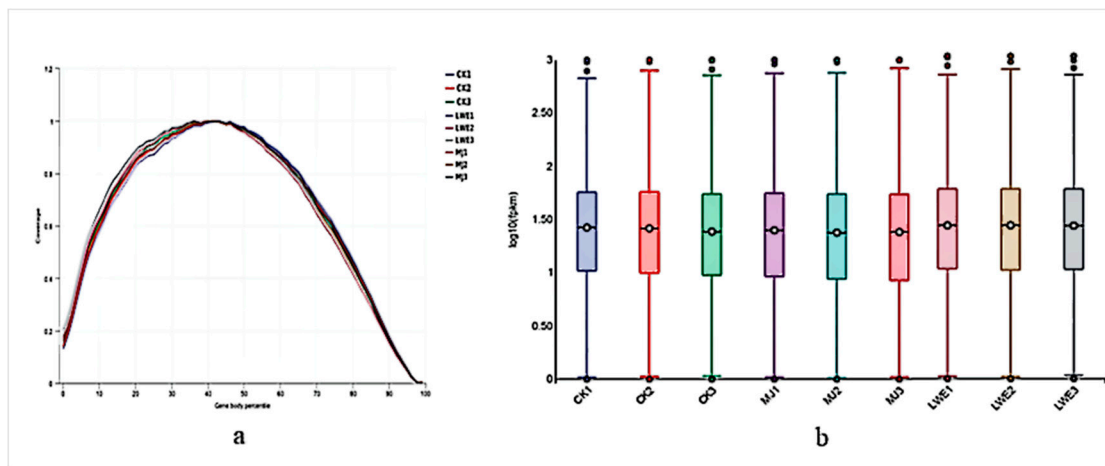

Figure S4 (a)Analysis of gene coverage uniformity of different samples; (b) FPKM violin diagram of three groups in *T. camphoratus* mycelia.

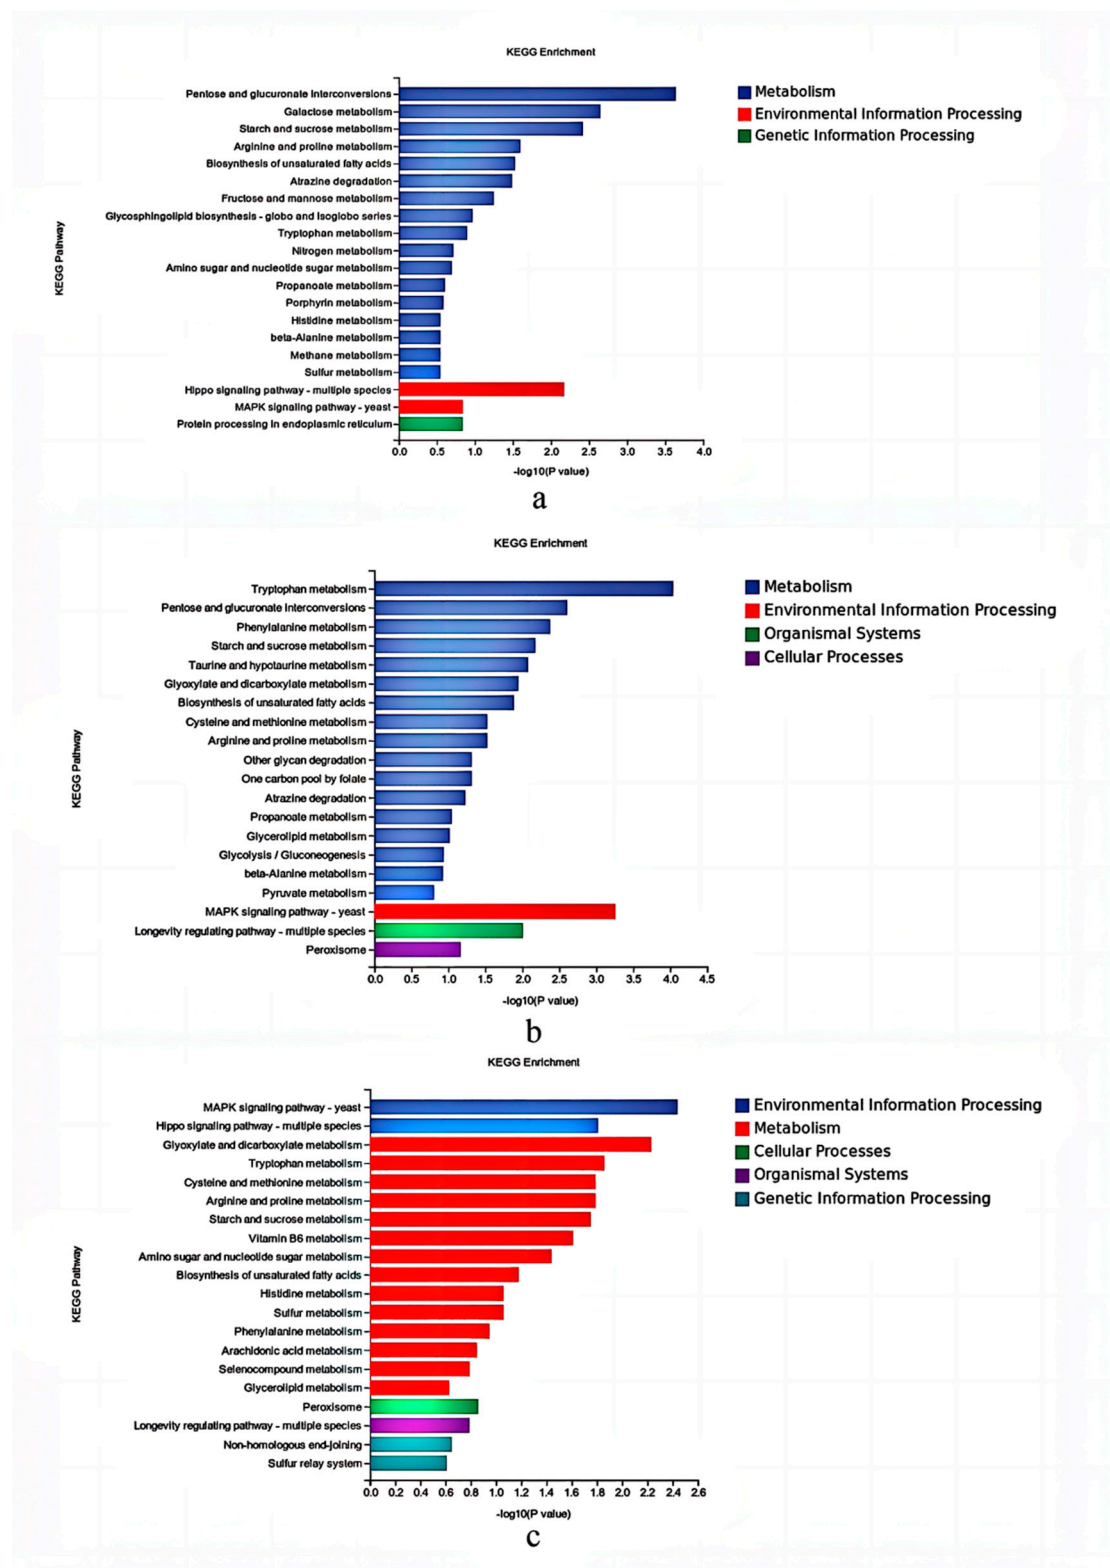

Figure S5 KEGG enrichment analysis of different groups. (a) The KEGG enrichment of CK and LWL; (b) The KEGG enrichment of CK and MJ; (c) The KEGG enrichment of LWL and MJ.

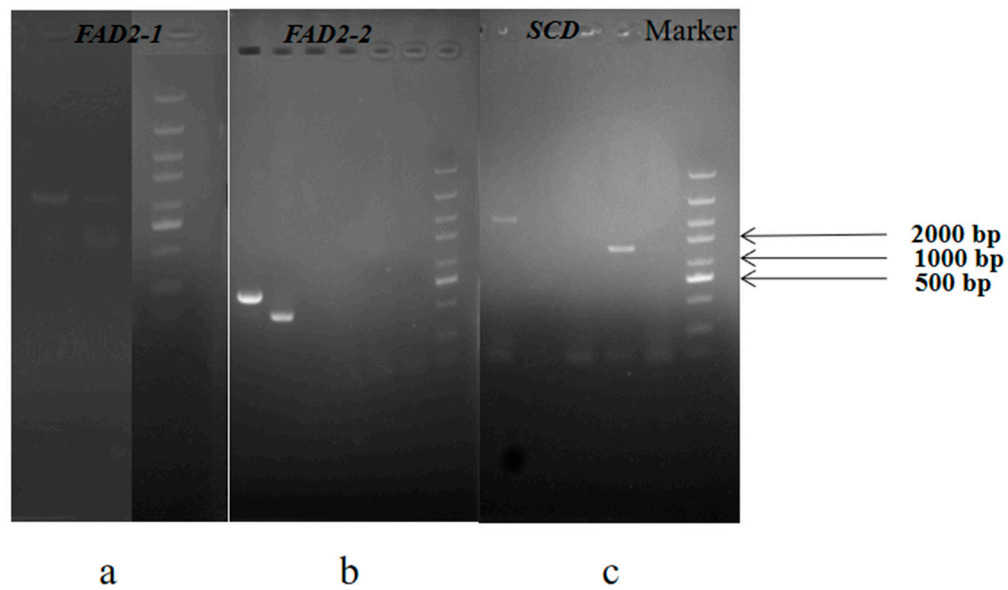

Figure S6 The agarose gel electrophoresis of three genes in *T. camphoratus* mycelia. (a) The gene is *FAD2-1*, DNA was 1,230 bp and its cDNA length was 873 bp; (b) *FAD2-2*, DNA was 576 bp and its cDNA length was 438 bp; (c) *SCD* DNA was 2,065 bp and its cDNA length was 1,419 bp.



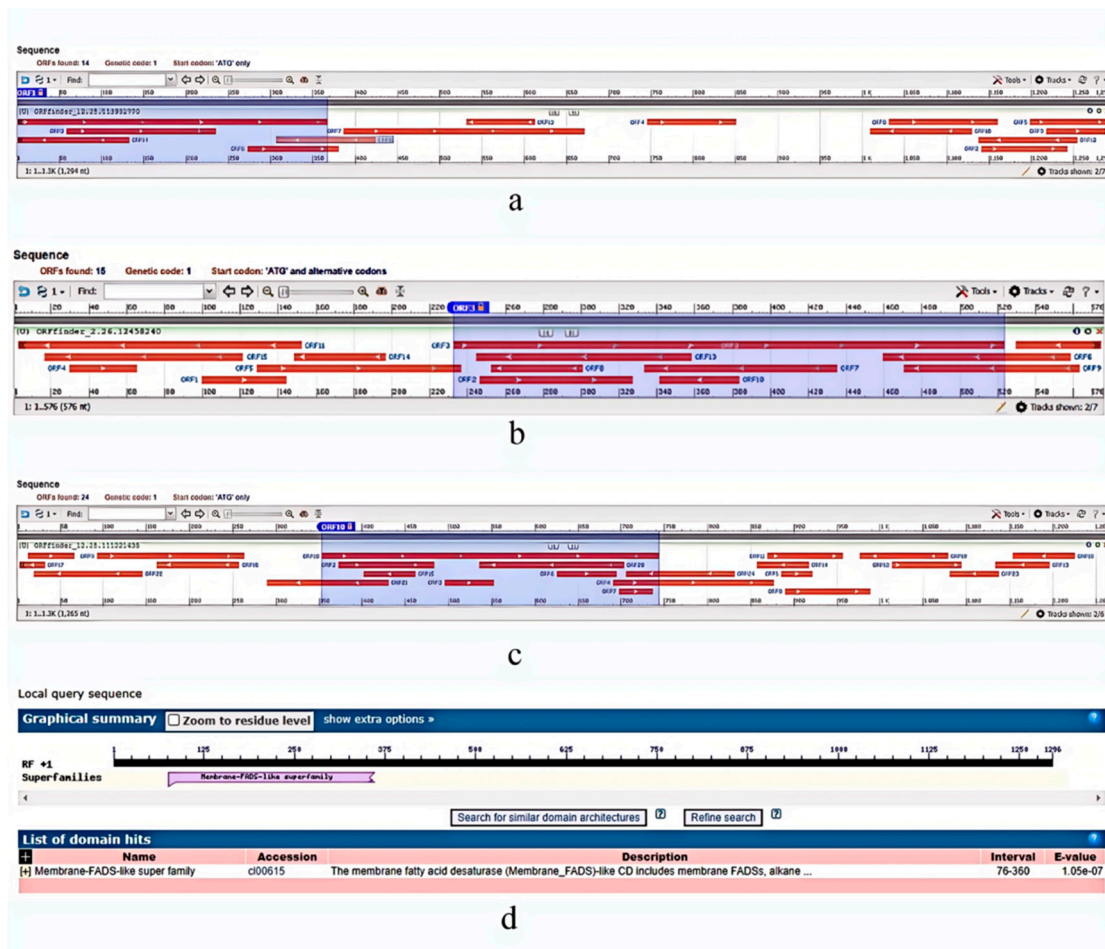

Figure S7 Open reading frame of *FAD2-1* (a), *FAD2-2* (b), and *SCD* (c) in *T. camphoratus* mycelia; Conserved domain prediction of *FAD2-1* gene and *FAD2-2* gene in *T. camphoratus* mycelia (d).

Table S1 annotation of five databases

| Databases | Number(bp) | Percentage(%) |
|-----------|------------|---------------|
| NR        | 18,967     | 84.79         |
| GO        | 7,241      | 32.37         |
| KEGG      | 7,630      | 34.11         |
| eggNOG    | 17,715     | 79.19         |
| Swissprot | 12,662     | 56.6          |
